# Supplementary material
Source: PubMed Central journal article supplement (PMC6686855)
Supplement: NIHMS1044012-supplement-S1.pdf [file NIHMS1044012-supplement-S1.pdf]

In the format provided by the authors and unedited.

# A clinically meaningful metric of immune age derived from high-dimensional longitudinal monitoring

**Ayelet Alpert<sup>1,10</sup>, Yishai Pickman<sup>1,10</sup>, Michael Leipold<sup>2</sup>, Yael Rosenberg-Hasson<sup>2</sup>, Xuhuai Ji<sup>2</sup>, Renaud Gaujoux<sup>1,3</sup>, Hadas Rabani<sup>1</sup>, Elina Starosvetsky<sup>1</sup>, Ksenya Kveler<sup>1</sup>, Steven Schaffert<sup>2,4</sup>, David Furman<sup>2</sup>, Oren Caspi<sup>1,5</sup>, Uri Rosenschein<sup>1,6</sup>, Purvesh Khatri<sup>2,4</sup>, Cornelia L. Dekker<sup>2,7</sup>, Holden T. Maecker<sup>2,8</sup>, Mark M. Davis<sup>2,8,9,11\*</sup> and Shai S. Shen-Orr<sup>1,11\*</sup>**

---

<sup>1</sup>Faculty of Medicine, Technion - Israel Institute of Technology, Haifa, Israel. <sup>2</sup>Institute of Immunity, Transplantation and Infection, Stanford University School of Medicine, Stanford, CA, USA. <sup>3</sup>CytoReason, Tel-Aviv, Israel. <sup>4</sup>Biomedical Informatics Research, Department of Medicine, Stanford University School of Medicine, Stanford, CA, USA. <sup>5</sup>Department of Cardiology, Rambam Health Care Campus, Haifa, Israel. <sup>6</sup>Department of Cardiology, Bnai Zion Medical Center, Haifa, Israel. <sup>7</sup>Division of Pediatric Infectious Diseases, Stanford University School of Medicine, Stanford, CA, USA. <sup>8</sup>Department of Microbiology & Immunology, Stanford University School of Medicine, Stanford, CA, USA. <sup>9</sup>The Howard Hughes Medical Institute, Chevy Chase, MD, USA. <sup>10</sup>These authors contributed equally: A. Alpert, Y. Pickman. <sup>11</sup>These authors jointly supervised this work: M. M. Davis, S. S. Shen-Orr.  
\*e-mail: [mmdavis@stanford.edu](mailto:mmdavis@stanford.edu); [shenorr@technion.ac.il](mailto:shenorr@technion.ac.il)

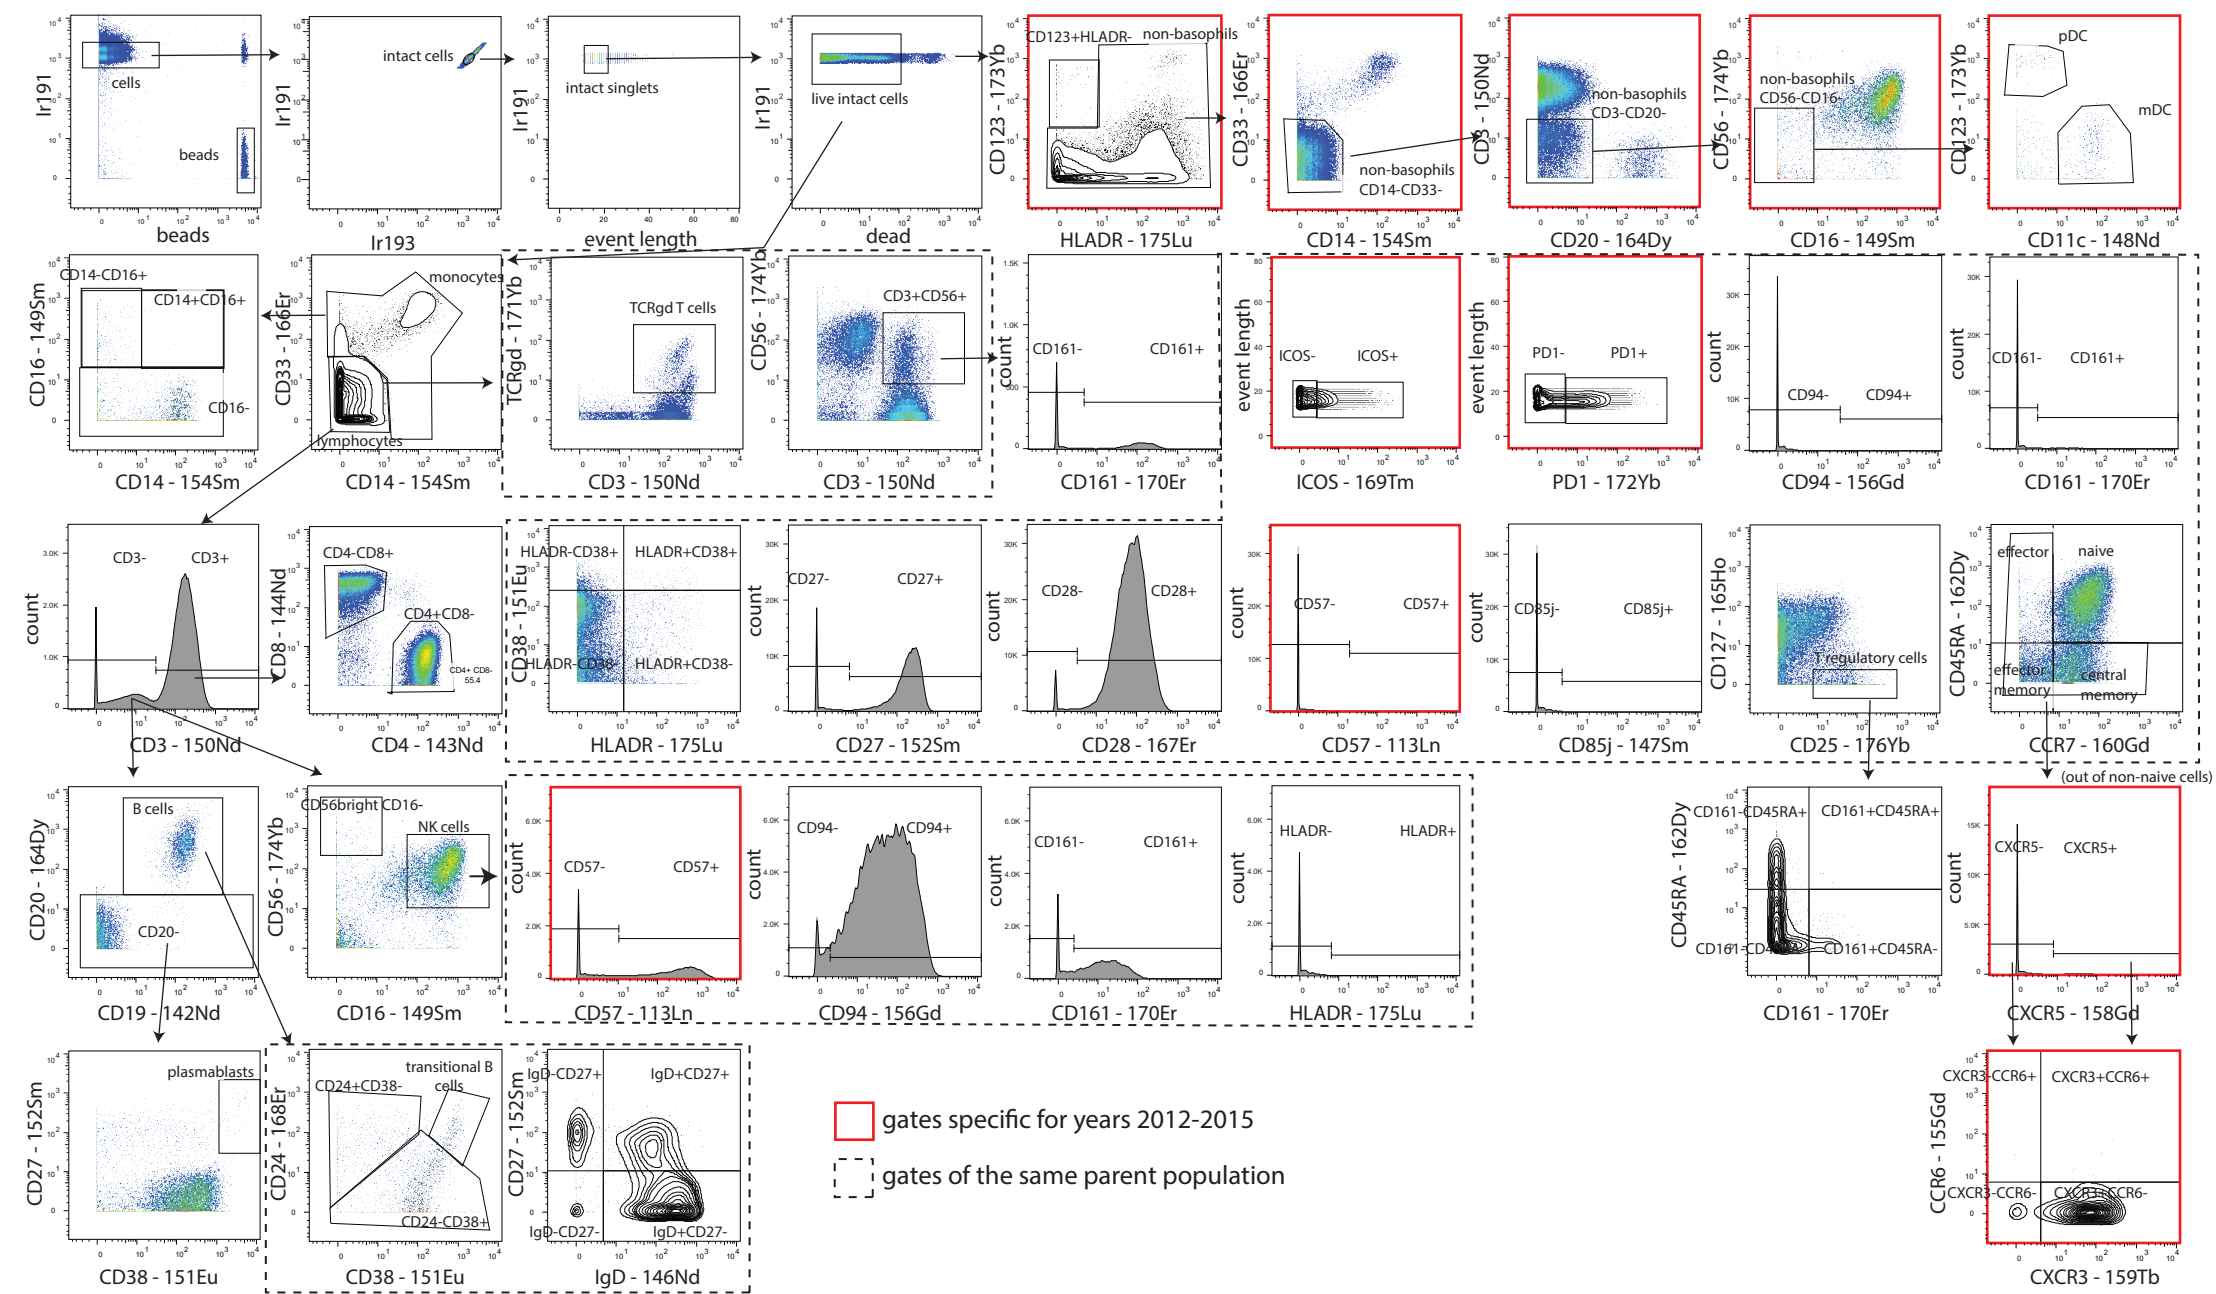

**Supplementary Figure 1: CyTOF gating strategy.** Gating from parental populations is assigned with arrows. Red frames denote gates that are specific to the years 2012-15, whereas dashed frames denote gates from the same parental population.

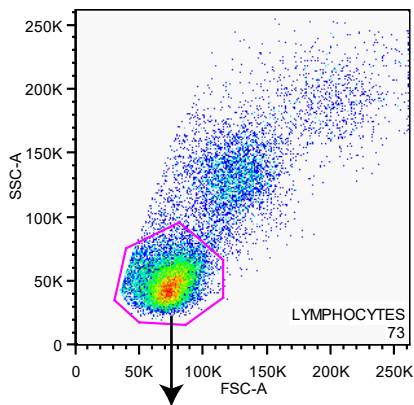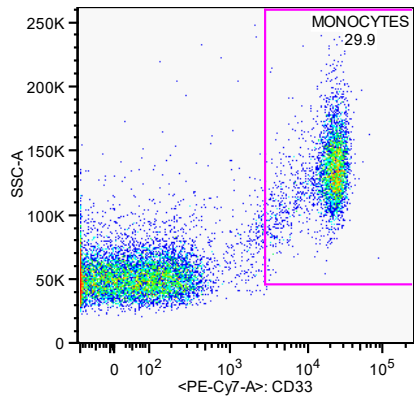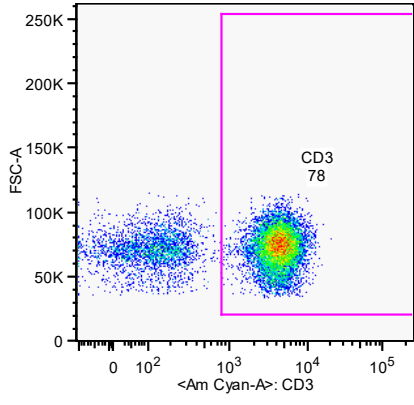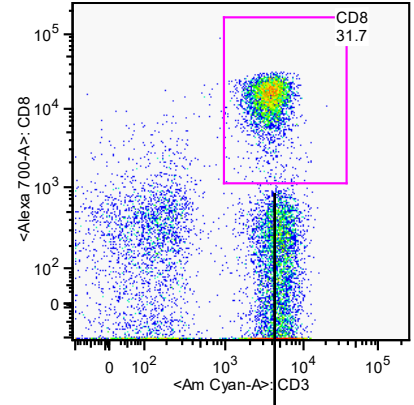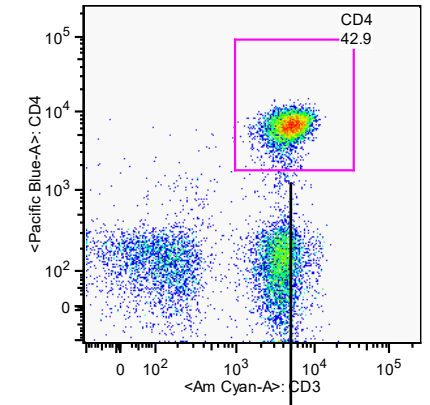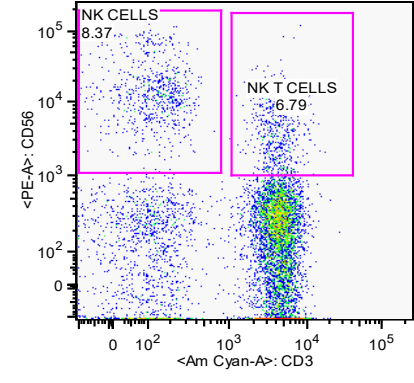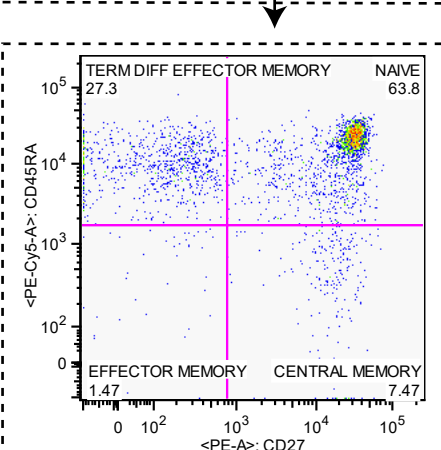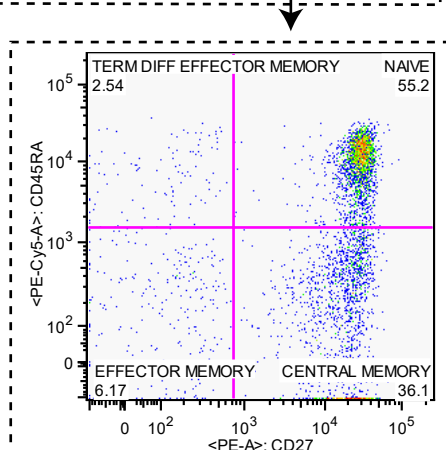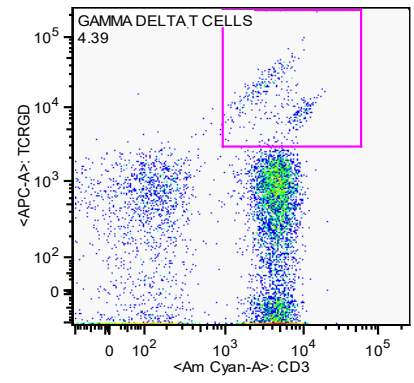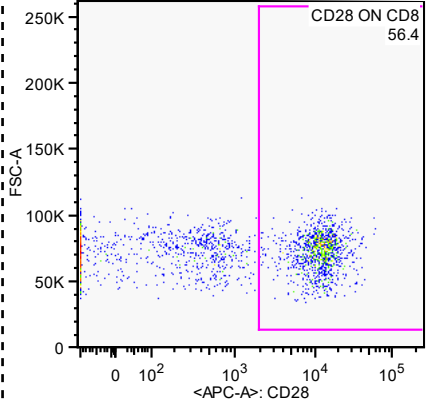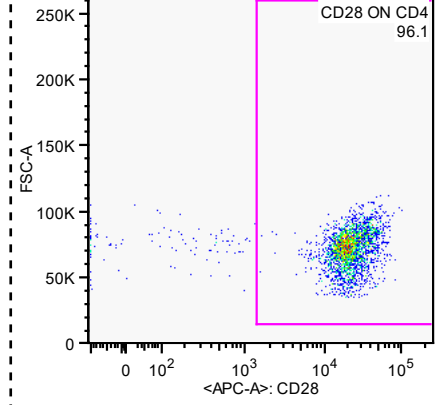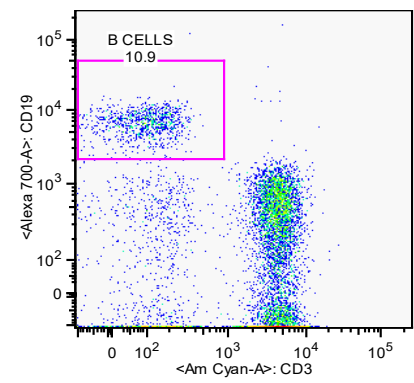

gates of the same parent population

**Supplementary Figure 2: Flow cytometry 2007-2008 gating strategy.** Gating from parental populations is assigned with arrows. Dashed frames denote gates from the same parental population.

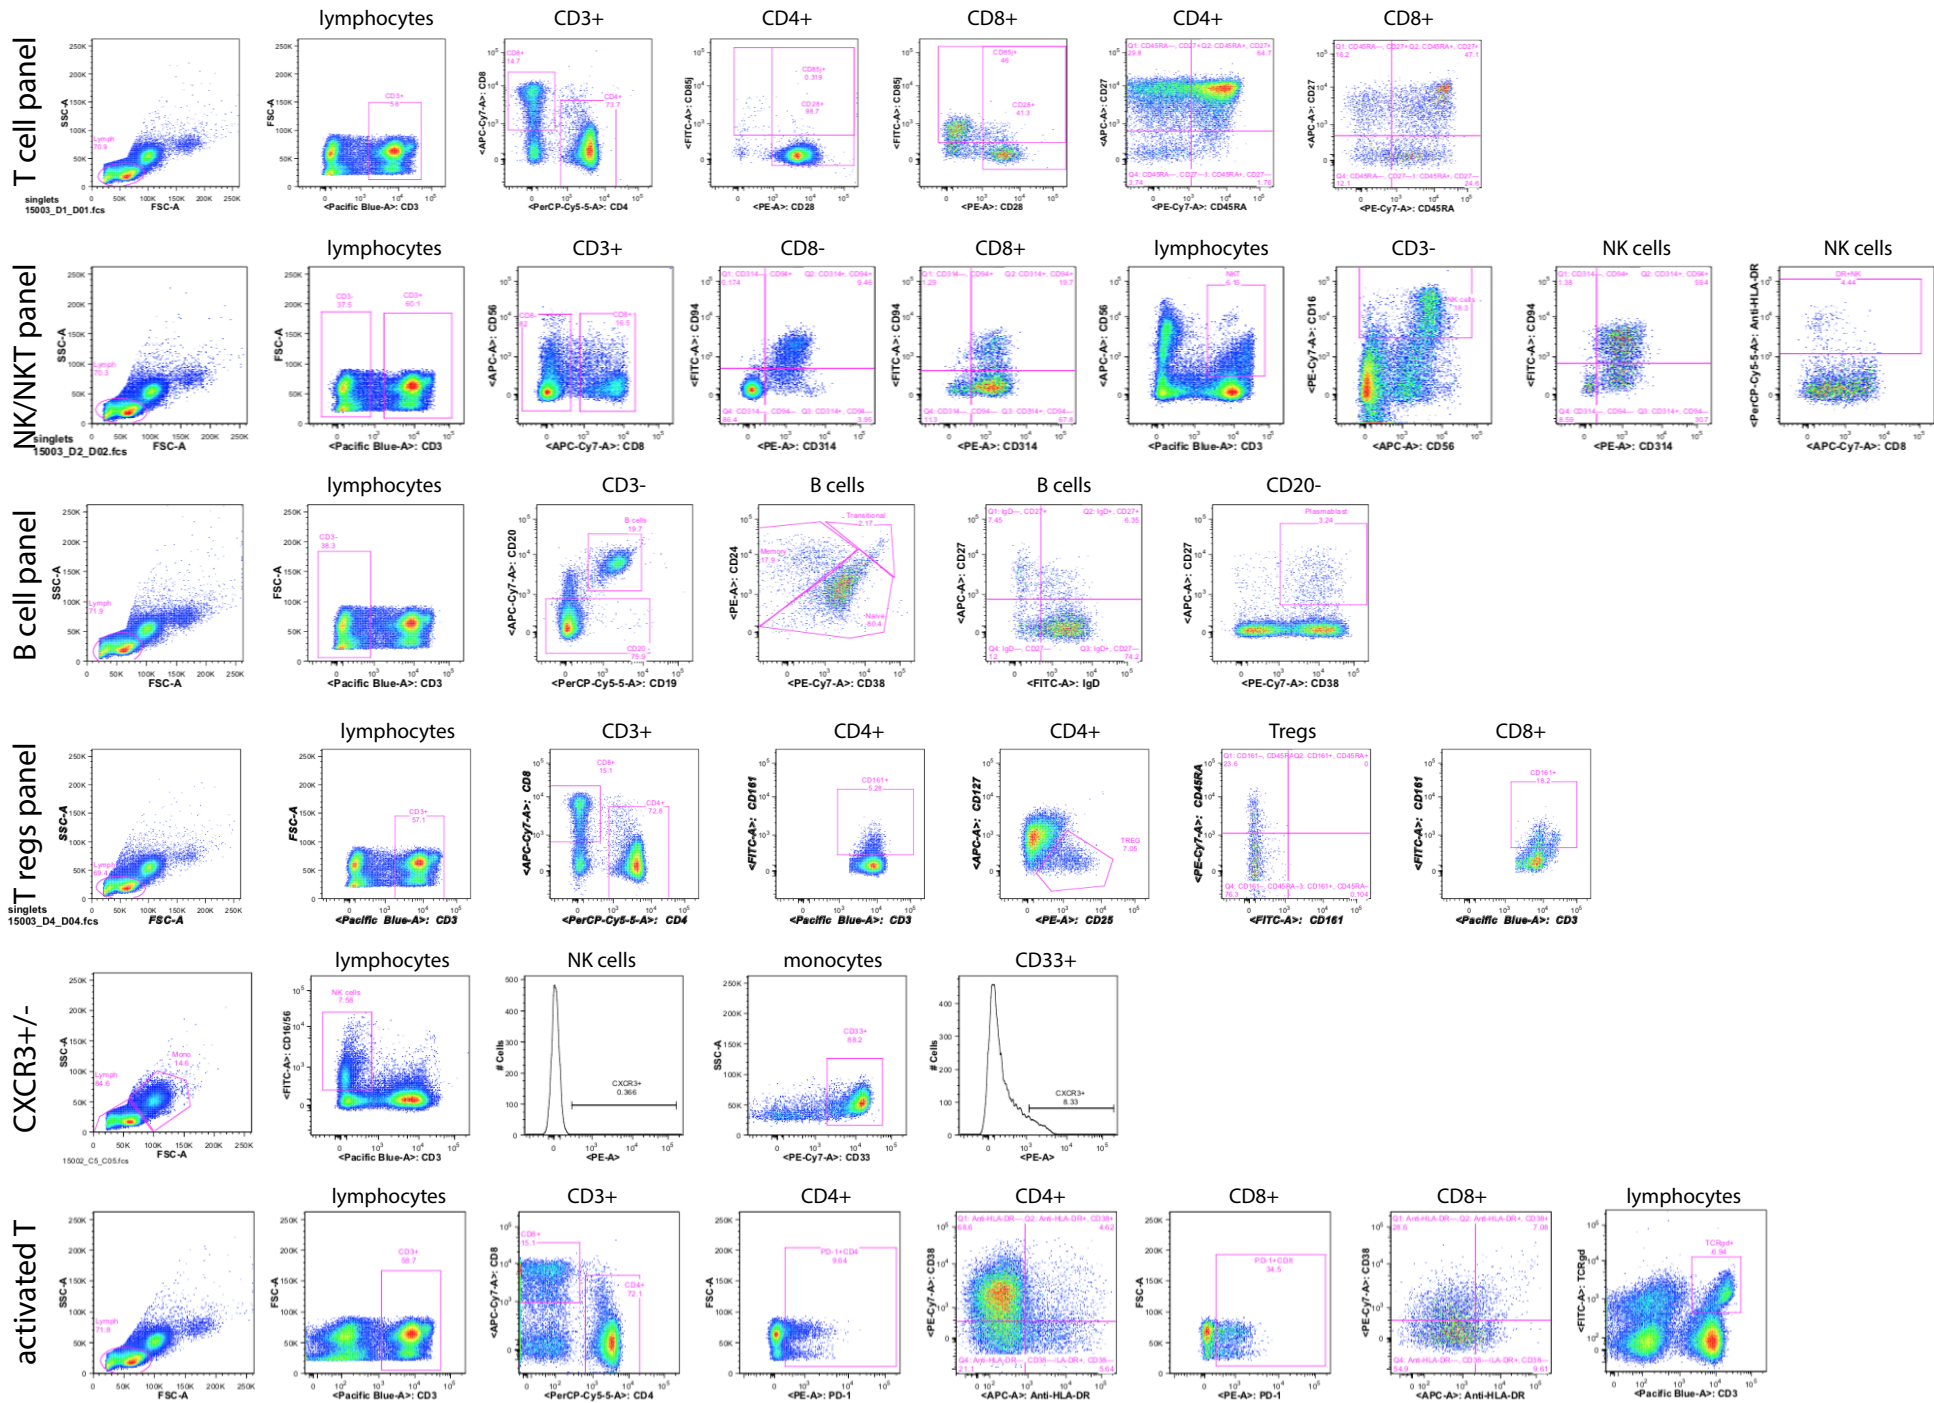

**Supplementary Figure 3: Flow cytometry 2009 gating strategy.** Different panels are ordered by row. Parent populations are shown on top of the corresponding gate.

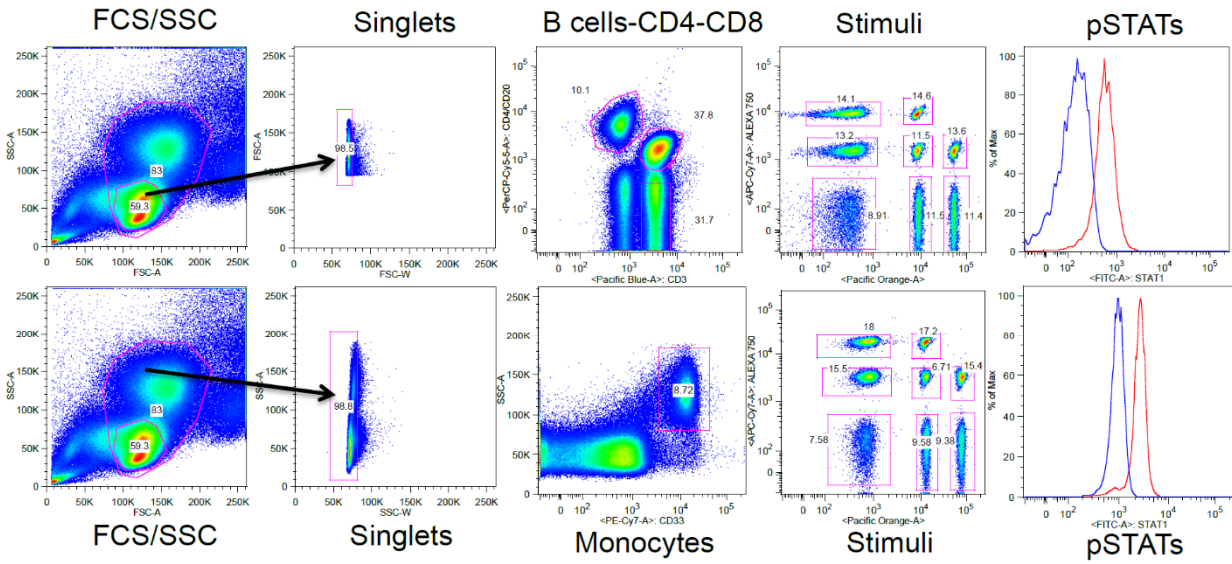

Barcode key

|                 | Unstim | IFN- $\alpha$ | IFN- $\gamma$ | IL-6 | IL-7 | IL-10 | IL-21 | IL-2 |
|-----------------|--------|---------------|---------------|------|------|-------|-------|------|
| Pacific Orange  | -      | Low           | High          | -    | Low  | -     | Low   | High |
| Alexa Fluor 750 | -      | -             | -             | Low  | Low  | High  | High  | Low  |

**Supplementary Figure 4: phospho-flow gating strategy.** Stimuli were debarcoded to derive cellular abundance of phosphorylated antigens in each cell population.



## **Supplementary Note 1 – Relation of Immune Features at Baseline with Future Clinical Events**

Relation of immune-features with a certain disease is an open question that has been previously addressed by hypothesis-driven studies where the disease was intentionally well-represented in the study cohort. As a longitudinal study, our data may be utilized to relate the levels of specific immune-features at baseline with future clinical outcome, allowing for identification of causal relationships between a disease and age-related immune-features. To identify such correlations, we examined the clinical records of the older-adults for events that occurred during the study and stratified their clinical diagnoses into high-resolution classes (**Supplementary Table 13**). This classification yielded more than 300 unique diagnoses, where each was diagnosed on average in 2.9% of the older adult population. We reasoned that because of this sparseness, demonstration of a causal effect between immune-features and these diagnoses will be underpowered. Thus, we classified the diagnoses into larger and less-specific groups to yield 24 clinical categories, each was diagnosed on average in 21.9% of the older adult population (**Supplementary Table 13**). Next, to identify causal relationships between immune-cell levels whose abundance change with age and these clinical categories, we applied a survival analysis in which for each combination of a cell subset and a clinical category, the future occurrence of events in the category was regressed against age, gender and the cell-subset frequency, as measured at some baseline year (specifically: 2007 or 2008, in order to maximize the number of future events). We identified some significant relationships between baseline cellular frequencies and future occurrence of a clinical category ( $P < 0.05$ , by multivariate Cox regression model incorporating baseline frequency in addition to age and gender). However, the large number of hypotheses, which equals to the number of age-related immune-features times the number of clinical categories, resulted with no significant correlation following multiple hypotheses correction (applied using Benjamini-Hochberg methodology). We concluded that the heterogeneity of clinical phenotypes existing in our cohort stemming from the absence of a specific driving clinical hypothesis prevents identification of disease-causing immune-features.

Similar to individual immune-features, applying a similar clinical association analysis on baseline IMM-AGE score as measured in 2010 with future occurrence of events related to clinical categories resulted with no significant association due to multiple testing.
